# Supplementary material for: Microwave-assisted preparation of a molecularly imprinted monolith combining an imidazolium ionic liquid and POSS for enhanced extraction of baicalin-like compounds in Scutellaria baicalensis by means of in-capillary SPME followed by on-line LC and off-line LC-MS/MS
Source: Royal Society of Chemistry journal article supplement (doi:10.1039/d0nj06254e), 2021-01-01
Supplement: d0nj06254e1.pdf [file d0nj06254e1.pdf]

**Microwave-Assisted Preparation of Molecularly Imprinted Monolith  
Combining Imidazolium Ionic Liquid and POSS for Enhanced  
Extraction of Baicalin-Like Compounds in *Scutellaria Baicalensis* by  
means of In-Capillary SPME Followed by on-line LC and off-line  
LC-MS/MS**

Xiaohan Zhang<sup>1</sup>, Le Gao<sup>2,3,4</sup>, Liying Niu<sup>1,3,4</sup> \*\* and Xiaodong Bi<sup>1,3,4</sup> \*

1. School of Materia Medica, Hebei University of Chinese Medicine, No.3 Xingyuan Lu, 050200, Shijiazhuang, Hebei, China

2. Department of Experiment Center, Hebei University of Chinese Medicine, No.3 Xingyuan Lu, 050200, Shijiazhuang, Hebei, China

3. Hebei Traditional Chinese Medicine Formula Granule Technology Innovation Center, No.326 Xinshi Nan Lu, 050091, Shijiazhuang, China

4. Hebei TCM Quality Evaluation & Standardization Engineering Research Center, Shijiazhuang 050091, China, No.326 Xinshi Nan Lu, 050091, Shijiazhuang, China

\*Corresponding author. Email: xiaodongb\_pharm@126.com

\*\*Corresponding author. Email: niuliyinygy@163.com

**Contents:**

**Figure S1** UV spectrum for the interaction between IL monomers and baicalin.

**Figure S2** CLC results at the optimal conditions.

**Figure S3** Chromatograms in range of 0-80 min for MIP-based SPME-HPLC analysis of microwave-assisted extraction of *Scutellaria baicalensis* (A) 100-fold diluted extraction. (B) 1000-fold diluted extraction.

**Figure S4** LC chromatograms of *Scutellaria baicalensis* extraction solution without any pretreatment

**Figure S5** LC chromatogram at 280 nm

**Figure S6** TIC (A) ESI+ (B) ESI-

**Figure S7** MS/MS for compound 1 (A) primary MS and (B) secondary MS

**Figure S8** MS/MS for compound 2 (A) primary MS and (B) secondary MS

**Figure S9** MS/MS for compound 3 (A) primary MS and (B) secondary MS

**Figure S10** MS/MS for compound 4 (A) primary MS and (B) secondary MS

**Figure S11** MS/MS for compound 5 (A) primary MS and (B) secondary MS

**Figure S12** MS/MS for compound 6 (A) primary MS and (B) secondary MS

**Table S1** Comparison of MIPs performance for analysis of baicalin

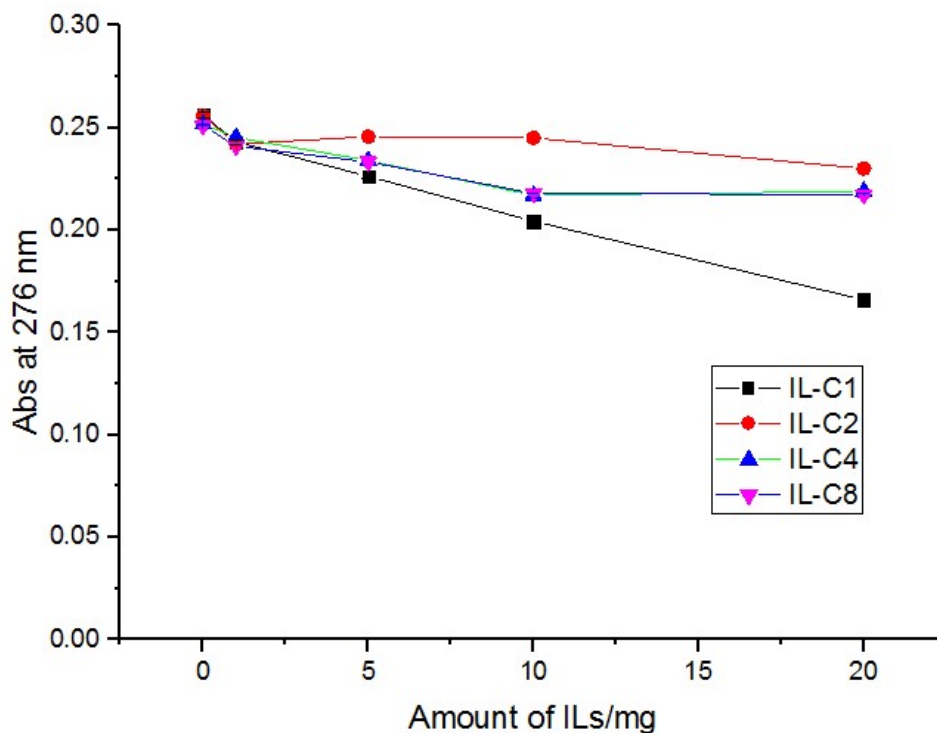

**Figure S1** UV spectrum for the interaction between IL monomers and baicalin.

In these experiments, 276 nm was the highest signal of baicalin. The signals at 276 nm could be attributed to flavone structure. When the amount of ILs grew, the signals at 276 nm decreased. When carbon chain length grew, the decreasing trend increased. The IL-1C gave the highest decreasing trend. It could only be speculated that the changes of signals at 276 nm showed the interaction between flavone structure and the imidazolium group, and the longer carbon chain could interfere with this interaction.

### Experiment for UV absorption spectra of baicalin-IL interaction

5 mg baicalin and one type of IL were dissolved in 100  $\mu$ L DMSO. Then the solutions were diluted 10,000 times by acetonitrile. The UV spectra in the range of 200-500 nm were collected. 4 types of ILs with different lengths of carbon chain (named as IL-1C, IL-2C, IL-4C and IL-8C by number of carbon atom ) were used. For each IL, a series of amount (0 mg, 1 mg, 5 mg, 10 mg and 20 mg) were used.

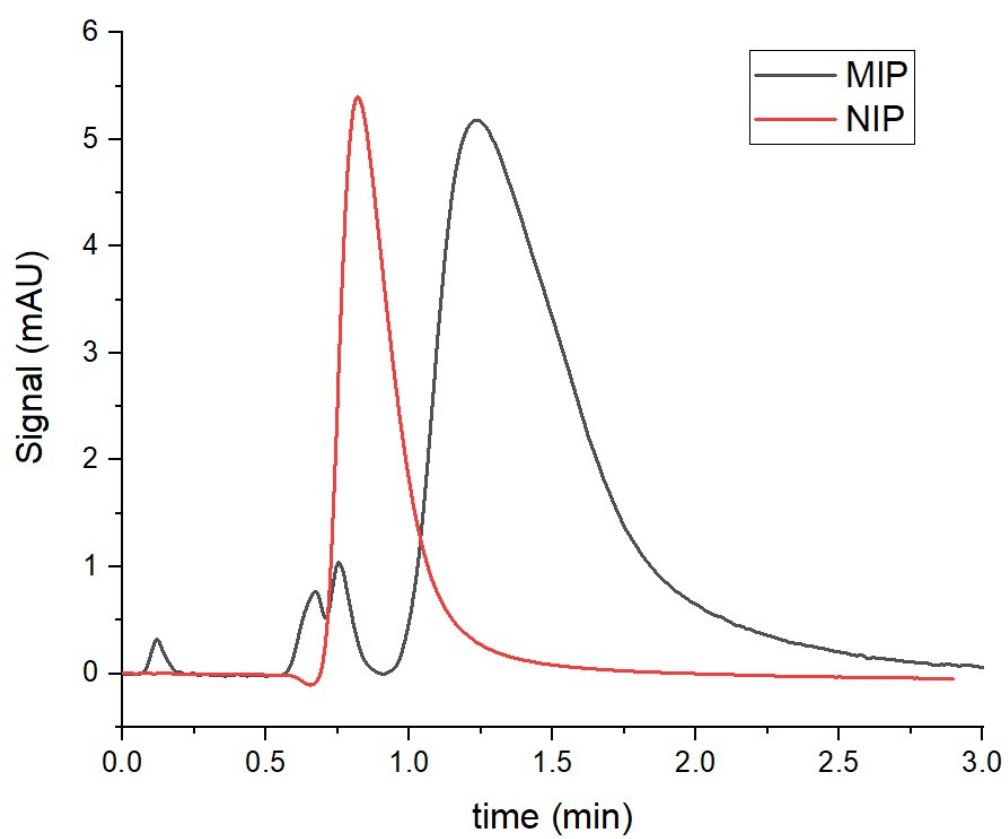

**Figure S2** CLC results at the optimal conditions.

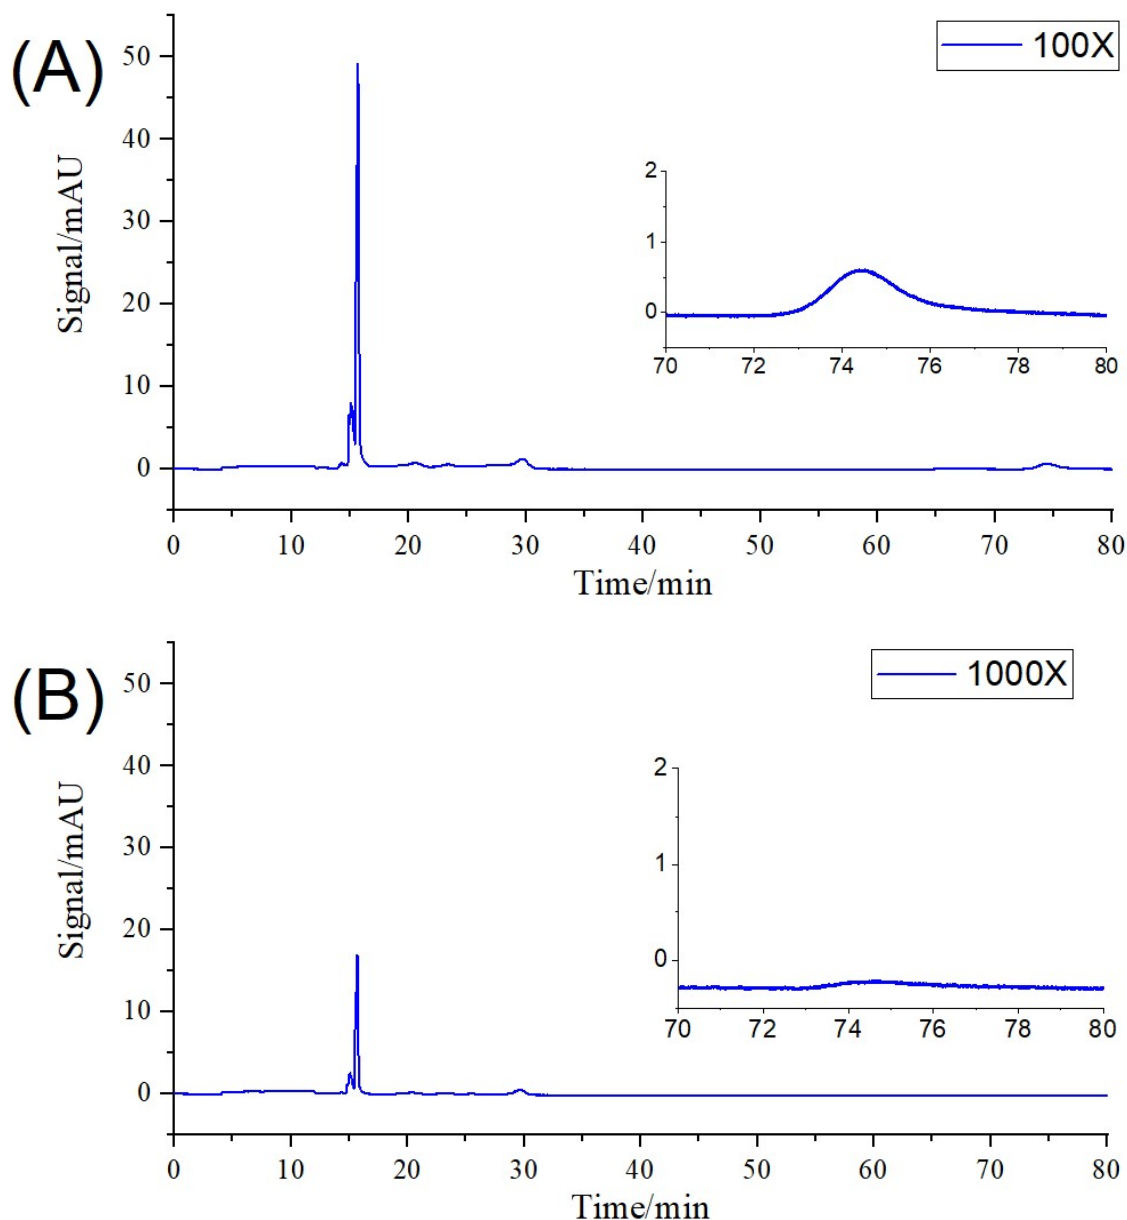

**Figure S3** Chromatograms in range of 0-80 min for MIP-based SPME-HPLC analysis of microwave-assisted extraction of *Scutellaria baicalensis* (A) 100-fold diluted extraction. (B) 1000-fold diluted extraction.

There was one peak at 74.7 min. At 100-fold diluted sample, this peak was detectable. However, at 1000-fold diluted sample, this peak became smaller and was almost undetectable. So the peak at 74.7 min was from the extracted sample. Due to the isocratic elution and LC column used in the 2nd LC, the retention time was so long. Because there was no on-line LC-MS system in our lab, the off-line LC-MS was used to analyze the extracted peaks. And the off-line LC-MS used gradient elution and UPLC column to decrease analysis time. In addition, on-line 2nd SPME-LC system, due to the large sample volume eluted from SPME and directly loaded onto the 2nd

analysis, without any special instrumentation, UPLC column is not proper to handle such large sample volume and only LC column can be used. That is why the off-line LC-MS showed more resolution and less analysis time than the on-line LC result. So it is reasonable to stop LC-TOF-MS when no signals were detected above the baseline, and the results can the group-capture ability of the imprinted monolith. Because different LC columns and LC methods were used, it was difficult to directly attribute the peak at 74.7 min to any peak in the result of the off-line LC-MS. However, the results were showed that this peak was eluted within one run so that it would not interfere with the next analysis.

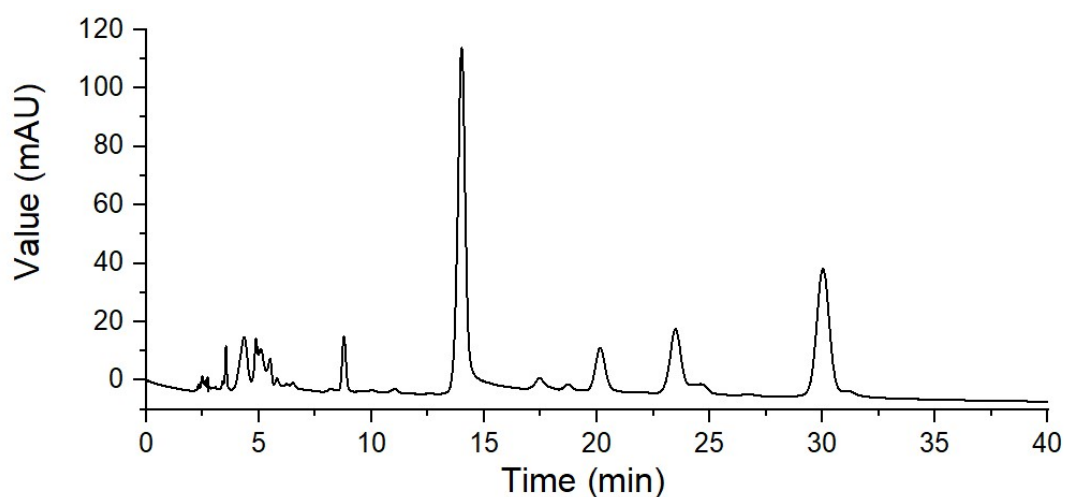

**Figure S4** LC chromatograms of *Scutellaria baicalensis* extraction solution without any pretreatment or dilution.

Column = WondaSil C18 column (4.6 mm  $\times$  250 mm, 5  $\mu$ m). The mobile phase = acetonitrile:water (containing 0.1% acetic acid) = 25:75, v/v), the flow rate was set at 1.0 mL/min, the injection volume was 5  $\mu$ L, the detected wavelength was 280 nm.

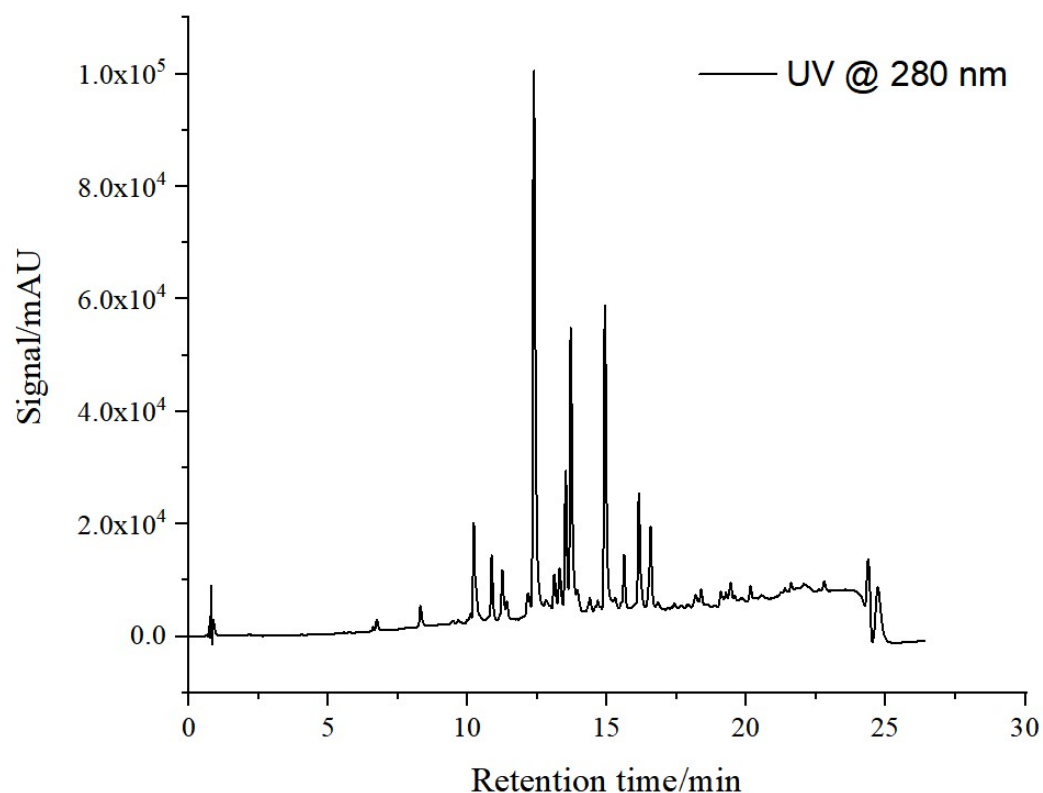

**Figure S5** LC chromatogram at 280 nm

Column = ZORBAX Eclipse XDB-C18 (2.1×50 mm, 1.8 μm), the mobile phase was (A) methanol containing 0.1% formic acid and (B) water containing 0.1% formic acid. The gradient (shown as A%, v/v) was 5%-95%@0-20 min, 95%-95%@20-22 min, 95%-5%@22-22.1 min, 5%-5%@22.1-30 min. The injection volume was 2 μL. The flow rate was 0.2 mL/min. The detection wavelength was 280 nm.

**(A)**

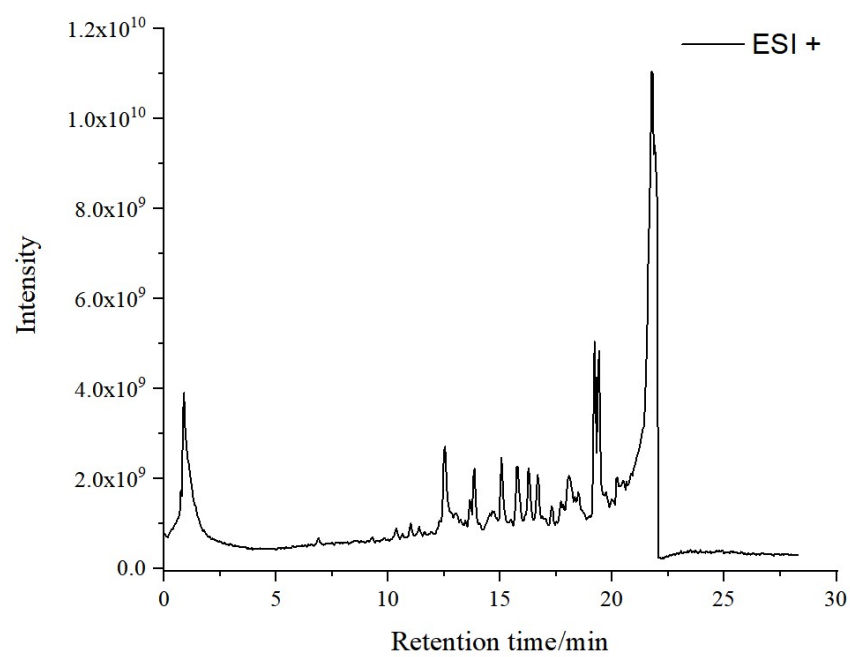

**(B)**

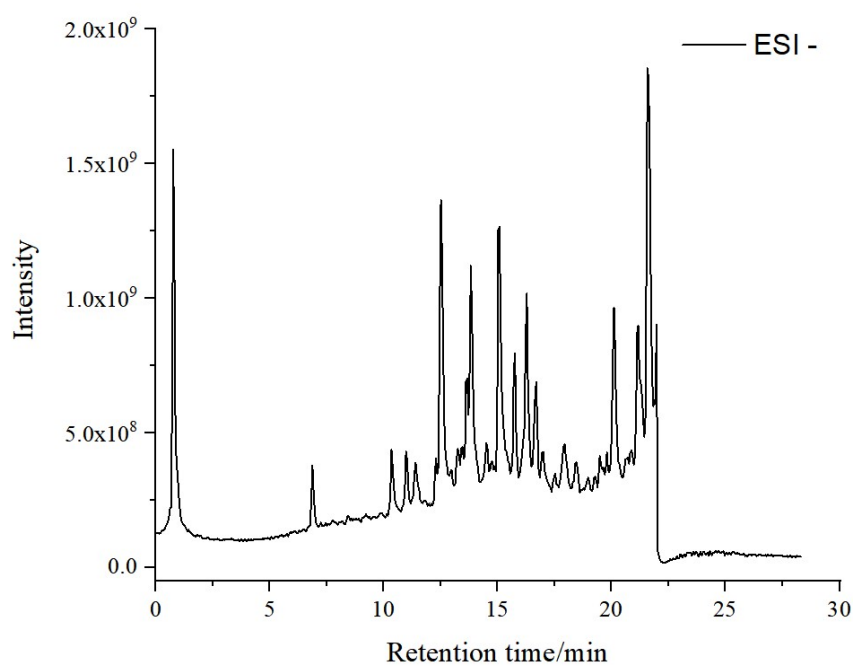

**Figure S6** TIC (A) ESI+ (B) ESI-

(A)

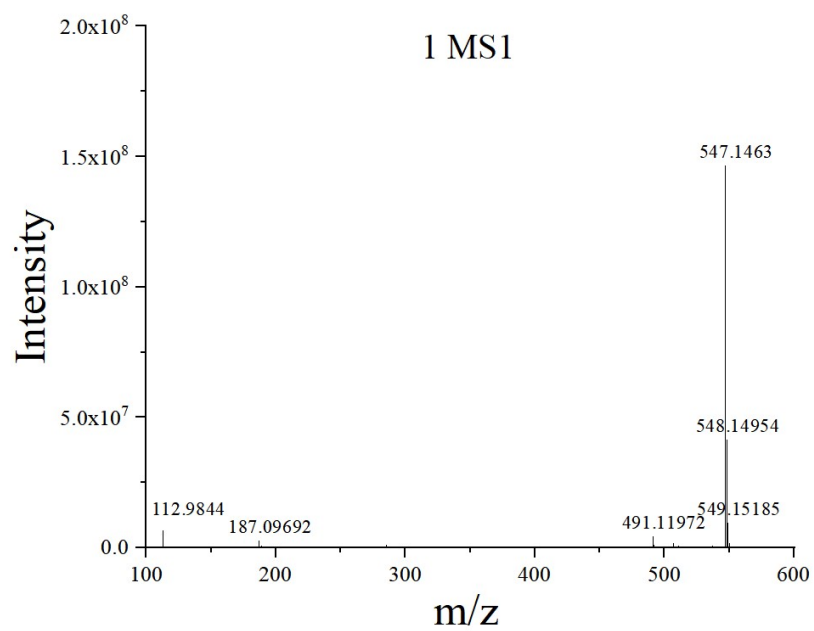

(B)

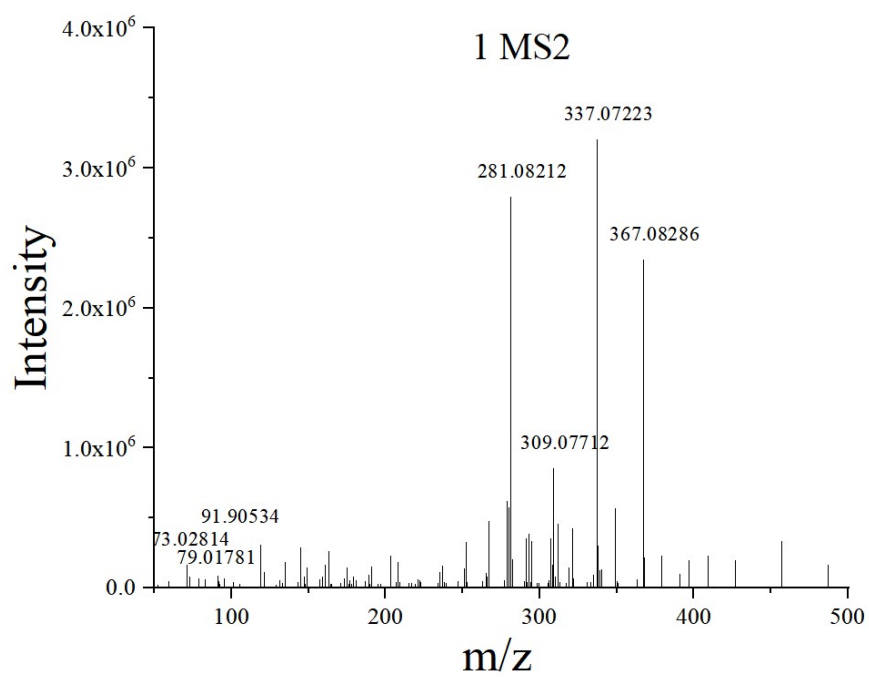

**Figure S7** MS/MS for compound 1 (A) primary MS and (B) secondary MS

(A)

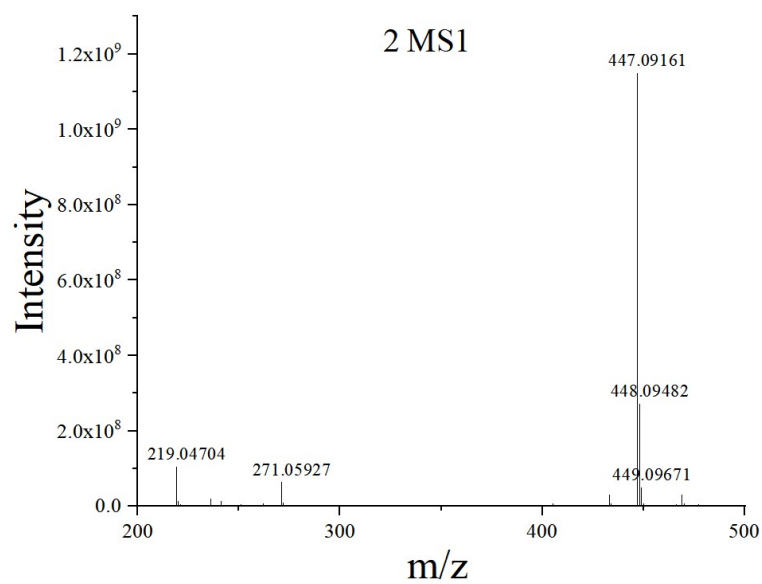

(B)

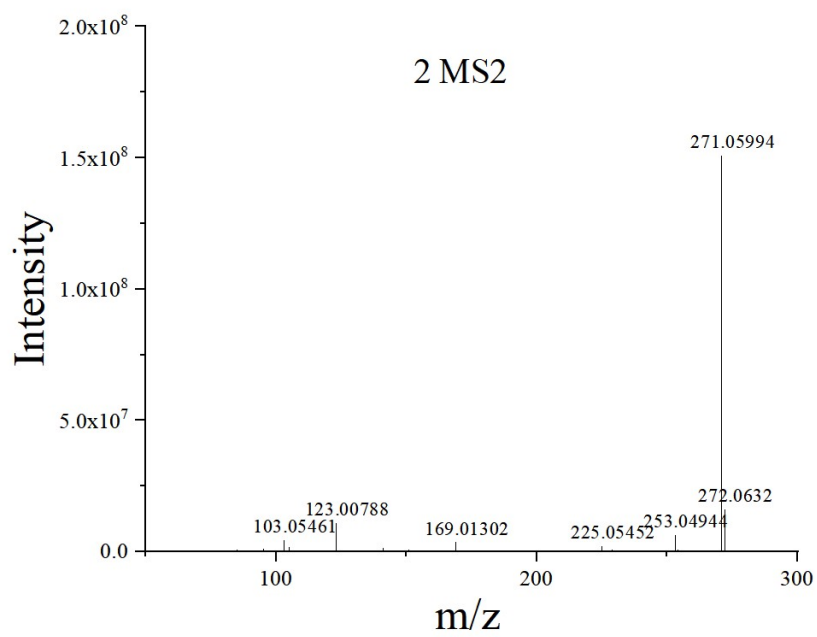

**Figure S8** MS/MS for compound 2 (A) primary MS and (B) secondary MS

(A)

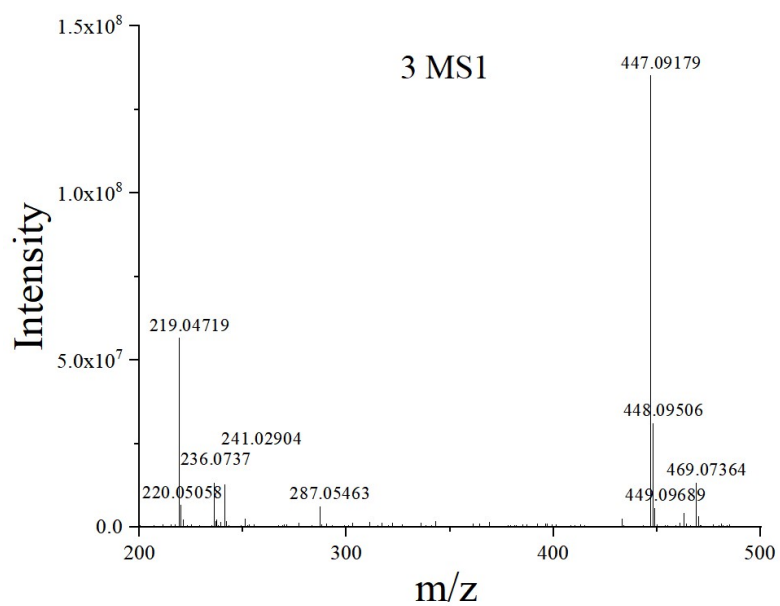

(B)

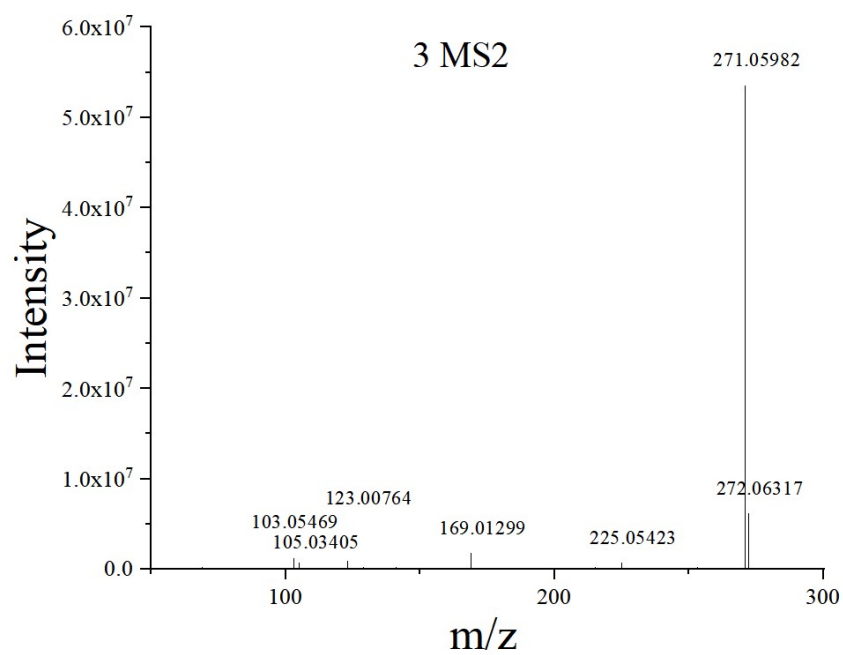

**Figure S9** MS/MS for compound 3 (A) primary MS and (B) secondary MS

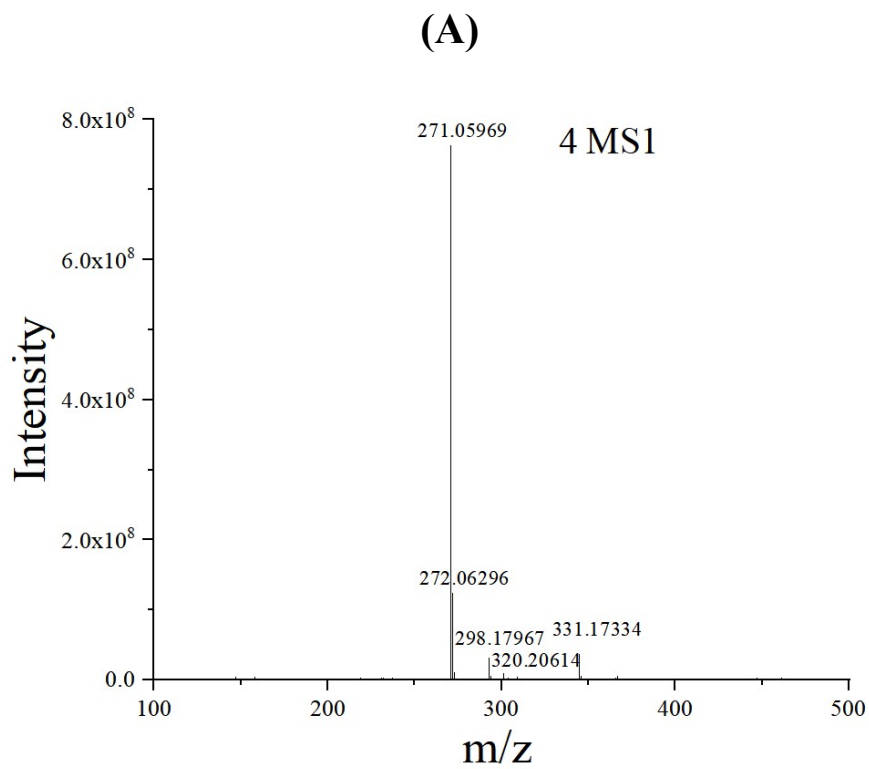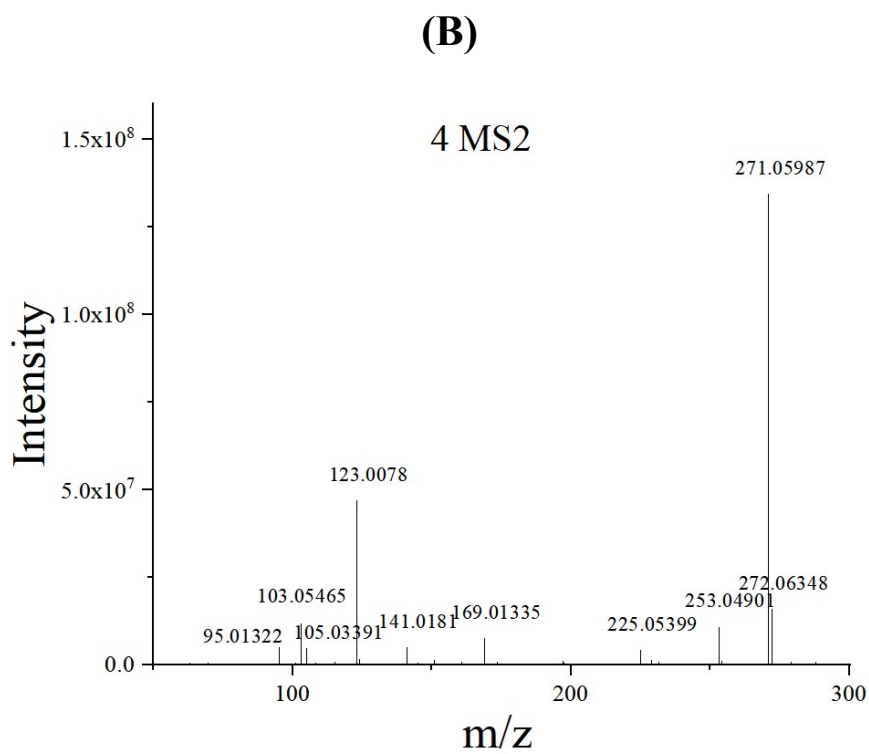

**Figure S10** MS/MS for compound 4 (A) primary MS and (B) secondary MS

(A)

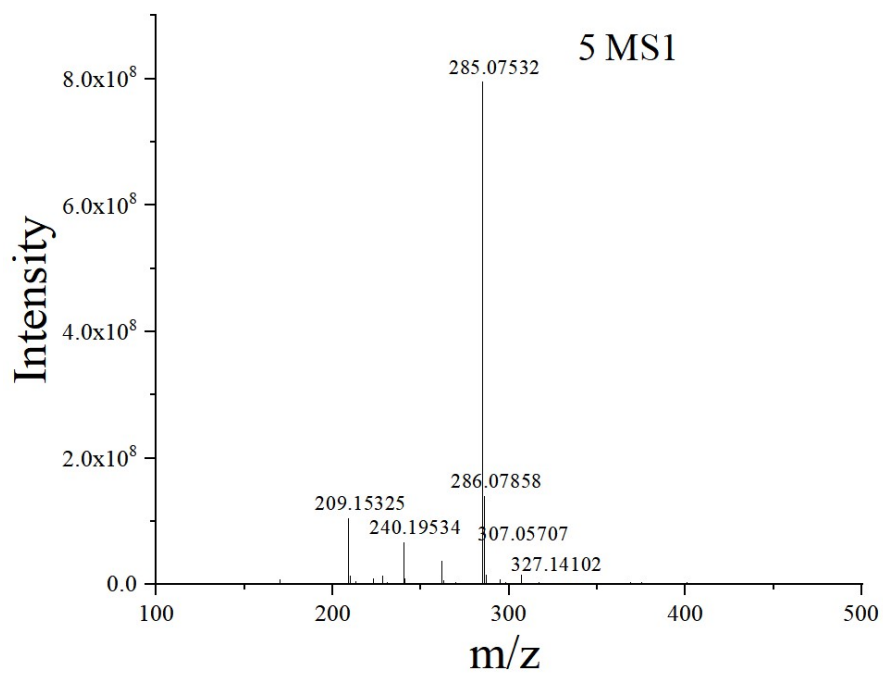

(B)

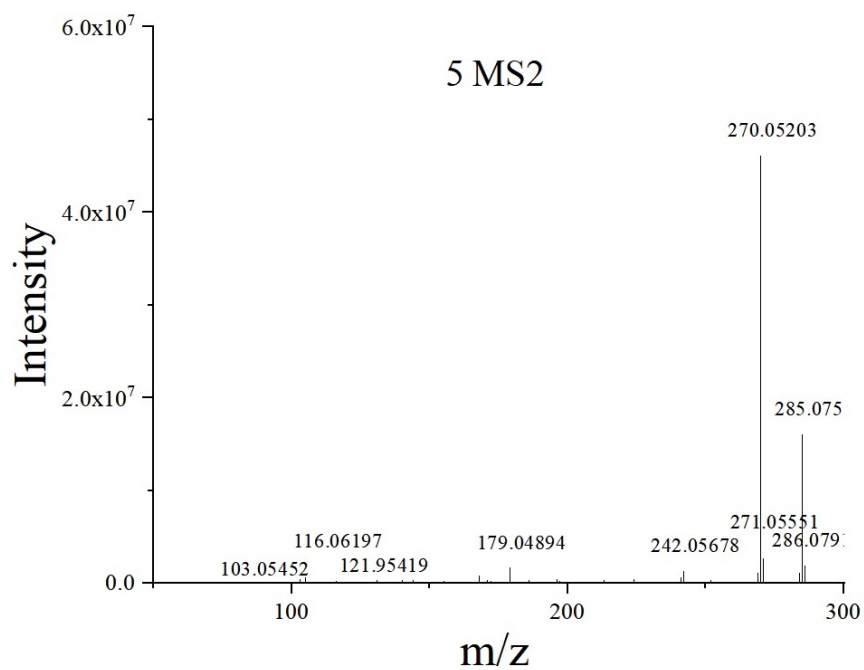

**Figure S11** MS/MS for compound 5 (A) primary MS and (B) secondary MS

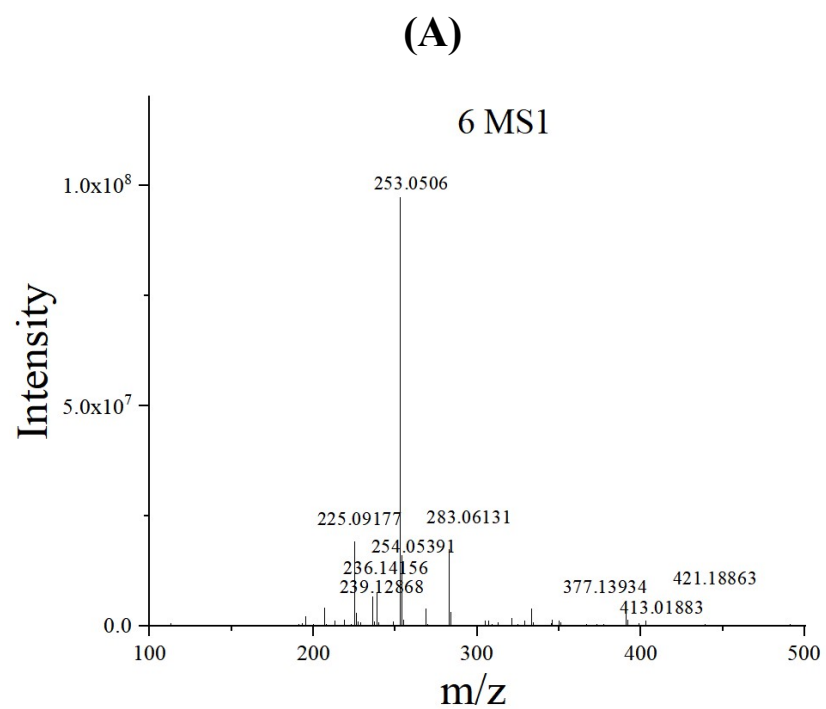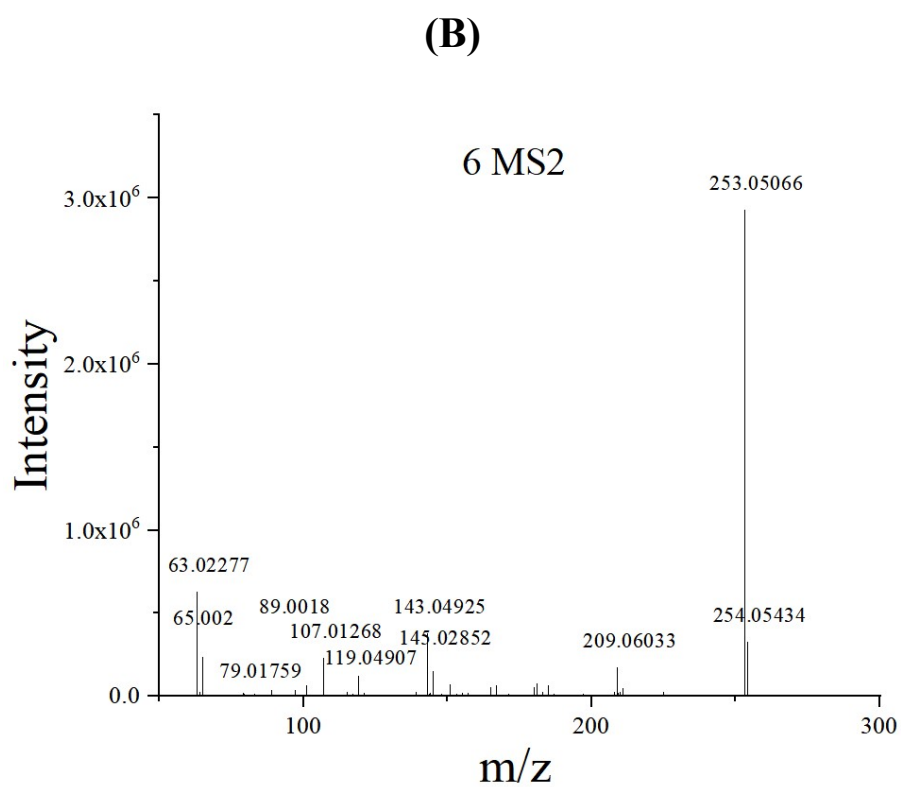

**Figure S12** MS/MS for compound 6 (A) primary MS and (B) secondary MS

**Table S1** Comparison of MIPs performance for analysis o baicalin

| Reference               | Imprinting Matertials                     | Sample                                                                                          | Applications                                       | Performance                                                                                    |
|-------------------------|-------------------------------------------|-------------------------------------------------------------------------------------------------|----------------------------------------------------|------------------------------------------------------------------------------------------------|
| (1)                     | polymer particles                         | natural herb <i>Plantago asiatica</i> L,<br>traditional Chinese medicine<br>Longdanxiegan bolus | SPE<br>Off-line HPLC                               | IF = 2.17<br>LOD/liner range, not provided                                                     |
| (2)                     | polymer particles<br>(surface imprinted)  | Biological samples<br>(liver/spleen)                                                            | SPE<br>Off-line HPLC                               | IF = 2.3<br>LOD = 0.6/0.7µg/mL Liner range: 1.0-7.0/15.0µg/mL                                  |
| (3)                     | polymer particles                         | herb of <i>S. baicalensis Georgi</i>                                                            | SPE<br>Off-line HPLC                               | IF = 4<br>LOD/liner range, not provided                                                        |
| (4)                     | polymer particles                         | <i>Scutellaria baicalensis Georgi</i>                                                           | SPE<br>Off-line HPLC                               | IF = 1.77<br>LOD = 0.3 ng/mL Liner range: 1.0 to 20 µg/mL                                      |
| (5)                     | Magnetic particles<br>(surface imprinted) | <i>S. baicalensis</i>                                                                           | SPE<br>Off-line HPLC                               | IF = 5.43<br>LOD = 0.0387 µg/mL Liner range: 0.500–179 µg/mL                                   |
| (6)<br>Previous<br>work | Monolith in<br>capillary                  | <i>Scutellaria baicalensis Georgi</i>                                                           | On-line SPME-HPLC<br>Off-line SPME-LC-MS           | IF = 2.2<br>LOD = 0.001µg/mL<br>Liner range: 0.001 mg/mL to 1 mg/mL, 1µg/mL to 100µg/mL        |
| This<br>work            | Monolith in<br>capillary                  | <i>Scutellaria baicalensis Georgi</i>                                                           | On-line SPME-HPLC<br>Off-line<br>SPME-LC-TOF-MS/MS | IF = 5.4<br>LOD = 0.001 µg/mL<br>Liner range: 0.001 µg/mL to 0.1 µg/mL, 0.1 µg/mL to 100 µg/mL |

## References

- (1) Mou, X. L.; Zhang, W. P.; Chen, Z. L., Highly selective extraction of baicalin in natural herbs and medicinal preparations by molecularly imprinted polymer. J. Appl. Polym. Sci. 2013, 130 (3), 1873-1878.
- (2) Gu, X. L.; He, H. L.; Wang, C. Z.; Gao, Y. K.; Zhang, H. J.; Hong, J. L.; Du, S. H.; Chen, L. N.; Yuan, C. S., Synthesis of surface nano-molecularly

imprinted polymers for sensitive baicalin detection in biological samples. RSC Adv. 2015, 5 (52), 41377-41384.

- (3) Liu, X.; Zhang, W. P.; Chen, Z. L., Preparation of a novel molecularly imprinted polymer for the highly selective extraction of baicalin. J. Sep. Sci. 2015, 38 (24), 4233-4239.
- (4) Li, H.; He, H. L.; Huang, J. J.; Wang, C. Z.; Gu, X. L.; Gao, Y. K.; Zhang, H. J.; Du, S. H.; Chen, L. N.; Yuan, C. S., A novel molecularly imprinted method with computational simulation for the affinity isolation and knockout of baicalein from *Scutellaria baicalensis*. Biomed. Chromatogr. 2016, 30 (2), 117-125.
- (5) Wang, D. D.; Luo, X. X.; Huang, Y. K.; Wang, M.; Xia, Z. N., Combined magnetic molecularly imprinted polymers with a ternary deep eutectic solvent to purify baicalein from the *Scutellaria baicalensis* Georgi by magnetic separation. Microchem J. 2020, 157, 12.
- (6) Bi, X. D.; Tian, W.; Wang, X.; Cao, W. L.; Gao, L.; Fan, S. S.; Wang, Y. C.; Wang, M.; Niu, L. Y., Preparation of a POSS-hybridized molecularly imprinted monolith for the analysis of baicalin and its analogues in a microwave-assisted extract from *Scutellaria baicalensis* by means of on-line SPME-HPLC and off-line LC-MS/MS. Anal. Methods 2019, 11 (17), 2351-2361.
